# Supplementary material for: Facile room-temperature fabrication of a silver–platinum nanocoral catalyst towards hydrogen evolution and methanol electro-oxidation
Source: Royal Society of Chemistry journal article supplement (doi:10.1039/d1ma01077h), 2021-12-15
Supplement: d1ma01077h1.pdf [file d1ma01077h1.pdf]

## Supporting Information

# A Facile Room-Temperature Fabrication of Silver-Platinum Nanocoral Catalyst Towards Hydrogen Evolution And Methanol Electro-Oxidation

*Hau Quoc Pham,<sup>1,2</sup> and Tai Thien Huynh<sup>3,\*</sup>*

<sup>1</sup>Future Materials & Devices Lab., Institute of Fundamental and Applied Sciences, Duy Tan University, Ho Chi Minh City, 700000, Viet Nam

<sup>2</sup>The Faculty of Environmental and Chemical Engineering, Duy Tan University, Da Nang, 550000, Viet Nam

<sup>3</sup>Ho Chi Minh City University of Natural Resources and Environment (HCMUNRE), Ho Chi Minh City, 700000, Viet Nam

\*Corresponding author. E-mail: [httai@hcmunre.edu.vn](mailto:httai@hcmunre.edu.vn)

## EXPERIMENTAL DETAILS

### Chemical reagents

All reagents were commercially purchased and used without further purification. Hexachloroplatinic acid ( $\text{H}_2\text{PtCl}_6 \cdot x\text{H}_2\text{O}$ ; ~38% Pt), silver nitrate ( $\text{AgNO}_3$ ;  $\geq 99.0\%$ ), and Nafion 117 solution (~5%) were purchased from Sigma-Aldrich, USA. Formic acid ( $\text{HCOOH}$ ; 98-100%), ethanol absolute ( $\text{C}_2\text{H}_5\text{OH}$ ; 99.5%), sulfuric acid ( $\text{H}_2\text{SO}_4$ , 95-97%); and methanol ( $\text{CH}_3\text{OH}$ ) were obtained from Merck, Belgium.

### Material Characterizations

X-ray diffraction (XRD) analysis was performed on a D2 PHASER (Bruker, Germany) using  $\text{Cu K}_\alpha$  radiation source ( $\lambda = 1.5418 \text{ \AA}$ ) in the  $2\theta$  range from  $20^\circ$  to  $80^\circ$  at a step size of  $0.02^\circ$  to collect the structure information of as-obtained catalysts. X-ray photoelectron spectroscopy (XPS) was analyzed on PHI 5000 VersaProbe (Ulvac-PHI) equipped with monochromator  $\text{Al K}_\alpha$  ( $h\nu = 1486.6 \text{ eV}$ ) X-ray source at a 10 mA current and 15 kV anode voltage. The morphology and size of the AgPt nanocatalyst were recorded through transmission electron microscopy (TEM) and HR-TEM images, which were carried out on a JOEF-JEM 2100F device at 200 kV. Before TEM measurement, the sample was dispersed in ethanol to generate a homogeneous suspension, which was cast on carbon film-coated copper microgrids.

The coherent length ( $D_{(hkl)}$ ) was estimated by Debye-Scherrer's formula (Eq.(1))<sup>1-3</sup>:

$$D_{(hkl)} = \frac{k\lambda}{\beta \cos\theta} \quad (\text{Eq. (1)})$$

where:  $D_{(hkl)}$  is average crystallite size (nm);  $k$  is Scherrer constant (0.94),  $\lambda$  is the wavelength of the incident X-ray ( $\lambda = 15406 \text{ \AA}$ );  $\beta$  is the line broadening at half the maximum intensity (FWHM), and  $\theta$  is the Bragg angle.

The lattice space ( $d_{(hkl)}$ ) was calculated by Bragg's law (Eq. (2))<sup>2, 3</sup>

$$d_{(hkl)} = \frac{\lambda}{2\sin\theta} \quad (\text{Eq. (2)})$$

where:  $d_{(hkl)}$  is lattice space ( $\text{\AA}$ );  $\lambda$  is the wavelength of the incident X-ray ( $\lambda = 15406 \text{ \AA}$ );  $\theta$  is the Bragg angle.

### **Electrochemical Properties**

Electrochemical tests were performed on a CHI 660 C Electrochemical Workstation (CHI Instruments Inc., USA) connected with a three-electrode electrochemical cell consisting of a glassy carbon electrode (GCE), platinum wire, and Hg/HgO electrode, which were used as a working electrode, a count and reference electrodes, respectively. In terms of the catalyst ink fabrication, 1.7 mg of catalyst was distributed in a mixture of 20  $\mu\text{L}$  of Nafion and 180  $\mu\text{L}$  of ethanol absolute, followed by the ultrasonication of 30 min to generate a homogeneous ink. To coat the obtained catalyst ink, the GCE surface was polished by 0.5  $\mu\text{m}$   $\text{Al}_2\text{O}_3$  and washed by absolute ethanol and purged water, and then 2.5  $\mu\text{L}$  of catalyst ink was drop-cast onto the GCE surface and dried naturally, followed by scanning in  $\text{N}_2$ -saturated 0.5 M  $\text{H}_2\text{SO}_4$  at 50  $\text{mV s}^{-1}$  for 100 cycles to get an active working electrode. The electrochemical surface area (ECSA) of investigated catalyst was estimated from hydrogen adsorption/desorption region in cyclic voltammetry (CV) in  $\text{N}_2$ -saturated 0.5 M  $\text{H}_2\text{SO}_4$  aqueous electrolyte at 25  $\text{mV s}^{-1}$  scan rate. The electrocatalytic performance towards hydrogen evolution reaction (HER) of catalysts was measured by linear sweep voltammetry (LSV) in  $\text{N}_2$ -saturated 0.5 M  $\text{H}_2\text{SO}_4$  at a 1  $\text{mV s}^{-1}$  scan rate. Electrochemical impedance spectroscopy (EIS) of electrocatalysts was collected at an amplitude of 5 mV in the frequency range from 0.1 to  $10^5$  Hz. In addition, the electrocatalytic activity towards methanol electro-oxidation reaction (MOR) of as-prepared catalyst was examined in  $\text{N}_2$ -saturated 0.5 M  $\text{H}_2\text{SO}_4 + 1.0 \text{ M CH}_3\text{OH}$  aqueous solution by CV and LSV tests. CO-stripping test was performed in 0.5 M  $\text{H}_2\text{SO}_4$  electrolyte, which was purged with nitrogen gas for 15 min and then CO gas bubbled for 45 min at 0.05  $V_{\text{RHE}}$ . In terms of the electrocatalytic

stability, chronoamperometry (CA) at fixed 0.7 V<sub>RHE</sub> and accelerated durability test (ADT) with the 2000-cycling test were also used. For comparison, the commercial Pt NPs/C (E-TEK) was used as a benchmark catalyst. All potential in this work was converted to a reversible hydrogen electrode (RHE) through the Nernst equation.

### ***Electrochemical surface area (ECSA) calculation***

The electrochemically surface area (ECSA) of Pt-based electrocatalyst was calculated from hydrogen adsorption/desorption regions in cyclic voltammetry (CV) curve in N<sub>2</sub>-saturated 0.5 M H<sub>2</sub>SO<sub>4</sub> electrolyte according to Eq. (3) <sup>4-6</sup>:

$$ECSA = \frac{Q_H}{0.21 * [Metal]} \quad (Eq. (3))$$

(3))

where Q<sub>H</sub> (mC cm<sup>-2</sup>) represents the coulombic charge for hydrogen adsorption; 0.21 (mC cm<sup>-2</sup>) is the charge required to oxidize an H<sub>2</sub> monolayer, and [Metal] is the loaded catalyst metal onto the working surface electrode (0.13 mg cm<sup>-2</sup>). Q<sub>H</sub> can be estimated by Eqs. (4) <sup>7, 8</sup>:

$$Q_H = \frac{1}{\nu A} \int I_{(V)} dV \quad (Eq. (4))$$

(4))

Where I (A) represents the peak current; V (V) is the peak potential;  $\nu$  (mV s<sup>-1</sup>) denotes the scanning rate, which is 25 mV s<sup>-1</sup> in this experiment; and A (cm<sup>-2</sup>) is the GCE's geometric area, which is 0.1964 cm<sup>-2</sup>.

### ***Turnover frequency (TOF) calculation***

The pre-site TOF value was calculated according to the following Eqs. (5-8) <sup>9-12</sup>

$$TOF (H_2 s^{-1}) = \frac{\#total\ hydrogen\ turnovers\ per\ geometric\ area}{\#active\ sites\ per\ geometric\ area} \quad (Eq. (5))$$

(5))

The number of total hydrogen turnovers was estimated from the current density extracted from

the LSV polarization curves according to:

$$\begin{aligned} \# \text{ total hydrogen turnovers} &= (|j| \frac{\text{mA}}{\text{cm}^2}) \left( \frac{1 \text{ C s}^{-1}}{1000 \text{ mA}} \right) \left( \frac{1 \text{ mole}^{-1}}{96485.3 \text{ C}} \right) \left( \frac{1 \text{ mol}}{2 \text{ mole}^{-1}} \right) \left( \frac{6.022 * 10^{23} \text{ molecules H}_2}{1 \text{ mol H}_2} \right) \text{ (Eq. (6))} \\ &= 3.12 * 10^{15} \frac{\text{H}_2 \text{ s}^{-1}}{\text{cm}^2} \text{ per } \frac{\text{mA}}{\text{cm}^2} \end{aligned}$$

The number of active sites in Pt-based catalysts was calculated from the mass loading on the working electrode, the Pt contents, and the Pt atomic weight, assuming each Pt center accounts for one active site:

$$\begin{aligned} \# \text{ active sites} &= \left( \frac{\text{catalyst loading per geometric area (x g cm}^{-2}) * \text{Pt wt\%}}{\text{Pt M}_w \text{ (g mol}^{-1})} \right) \left( \frac{6.022 * 10^{23} \text{ Pt atoms}}{1 \text{ mol Pt}} \right) \text{ (Eq. (7))} \\ &= \left( \frac{0.13 * 10^{-3} \text{ g cm}^{-2} * 8.51 \text{ wt\%}}{195.084 \text{ g mol}^{-1}} \right) \left( \frac{6.022 * 10^{23} \text{ Pt atoms}}{1 \text{ mol Pt}} \right) = 3.41 * 10^{16} \text{ Pt sites per cm}^2 \end{aligned}$$

Finally, the current density from the LSV polarization curve can be converted into TOF values according to:

$$\text{TOF (H}_2 \text{ s}^{-1}) = \left( \frac{3.12 * 10^{15}}{3.41 * 10^{16}} * |j| \right) = 0.091 * |j| \quad \text{(Eq. (8))}$$

(8))

### ***Tafel Slope Calculation for MOR***

The kinetic parameter of electrocatalyst for MOR was calculated by Tafel equation (9)<sup>13, 14</sup>

$$\eta = a + b \log i = -\frac{2.3RT}{\alpha nF} \log i_0 + \frac{2.3RT}{\alpha nF} \log i \quad \text{(Eq. (9))}$$

where R is gas constant, T (K) represents the absolute temperature,  $\alpha$  is the charge transfer coefficient, F is the Faraday constant,  $i_0$  (mA cm<sup>-2</sup>) is the exchange current density.

## Results and Discussion

**Table S1.** XRD determined structural parameters of AgPt NCs/C and Pt NPs/C (E-TEK).

| Catalysts        | $d_{(hkl)}^{(a)}$ |       |       | $D_{(hkl)}^{(b)}$ |       |       | $H_{(111)}/H_{(200)}$ | $H_{(111)}/H_{(220)}$ |
|------------------|-------------------|-------|-------|-------------------|-------|-------|-----------------------|-----------------------|
|                  | Å                 |       |       | nm                |       |       |                       |                       |
|                  | (111)             | (200) | (220) | (111)             | (200) | (220) |                       |                       |
| AgPt NCs/C       | 2.31              | 2.02  | 1.40  | 3.19              | 2.13  | 2.49  | 2.96                  | 7.50                  |
| Pt NPs/C (E-TEK) | 2.27              | 1.98  | 1.39  | 2.16              | 1.89  | 2.11  | 2.91                  | 6.02                  |

<sup>(a)</sup>Calculation from Bragg's law.

<sup>(b)</sup>Calculation from Debye-Scherrer's equation.

**Table S2.** A comparison of HER activity of recently reported catalysts in acidic electrolytes.

| Catalysts                                                | Overpotential <sup>(a)</sup> @ | Tafel Slope <sup>(a)</sup> | Ref.      |
|----------------------------------------------------------|--------------------------------|----------------------------|-----------|
|                                                          | 10 mA cm <sup>-2</sup>         | mV dec <sup>-1</sup>       |           |
| AgPt NCs/C                                               | 16.61                          | 19.05                      | This work |
| Pt NPs/C (E-TEK)                                         | 21.30                          | 21.37                      | This work |
| S-doped AuPdPt NWs                                       | 12                             | 17.7                       | 15        |
| Commercial Pt NPs/C                                      | 29                             | 25.2                       | 15        |
| Pt/PtTe <sub>2</sub> /NiCoTe <sub>2</sub> /NPFC HFSs     | 36                             | 23                         | 16        |
| Pt <sub>68</sub> Ag <sub>32</sub> NDs                    | 51                             | 39                         | 17        |
| Pt/GNs                                                   | 25                             | 33                         | 18        |
| Pt/PtTe <sub>x</sub> NRs                                 | 44                             | 23                         | 19        |
| Pt/NBF-ReS <sub>2</sub> /Mo <sub>2</sub> CT <sub>x</sub> | 29                             | 24                         | 20        |
| AgPt HANS                                                | 69                             | 40                         | 21        |
| Pt <sub>1</sub> /Co <sub>1</sub> NCs                     | 4.15                           | 17                         | 11        |
| Pt-PMo/ZIF-67-800                                        | 26                             | 30                         | 22        |
| Pt <sub>8</sub> Co                                       | 26.1                           | 34                         | 23        |
| Pt <sub>4</sub> Co <sub>1</sub> hollow sphere            | 14.8                           | 27.45                      | 24        |
| Pt/MoS <sub>2</sub> /CF <sub>s</sub>                     | 5                              | 53.6                       | 25        |
| Pt <sub>0.44</sub> V/3DHPNG/Au <sub>plla</sub> /GCE      | 12                             | 26.8                       | 26        |
| PtNPs/3DHPNG/Au <sub>plla</sub> /GCE                     | 10                             | 25.2                       | 26        |
| PtAg NFs/rGO                                             | 55                             | 31                         | 27        |
| PtNi/Pt DNP                                              | 21                             | 23                         | 28        |

<sup>(a)</sup>Calculation from LSV curves in N<sub>2</sub>-saturated 0.5 M H<sub>2</sub>SO<sub>4</sub> aqueous solution.

**Table S3.** A comparison of MOR performance of various Pt-based catalyst in acidic media.

| Catalysts                                         | ECSA <sup>(a)</sup><br>m <sup>2</sup> g <sub>Metal</sub> <sup>-1</sup> | Current density <sup>(b)</sup><br>mA cm <sup>-2</sup> | I <sub>f</sub> /I <sub>b</sub> <sup>(b)</sup> | Ref.      |
|---------------------------------------------------|------------------------------------------------------------------------|-------------------------------------------------------|-----------------------------------------------|-----------|
| AgPt NCs/C                                        | 81.36                                                                  | 22.65                                                 | 1.47                                          | This work |
| Pt NPs/C (E-TEK)                                  | 70.83                                                                  | 20.91                                                 | 0.85                                          | This work |
| Pt <sub>0.8</sub> Ru <sub>1</sub> /PANI/CNTs      | -                                                                      | 26.01                                                 | 1.36                                          | 29        |
| Pt <sub>1</sub> Pb <sub>2</sub> Ru <sub>0.5</sub> | 43                                                                     | 9.83                                                  | 1.52                                          | 30        |
| Commercial Pt NPs/C                               | -                                                                      | 7.29                                                  | 0.65                                          | 30        |
| o-PtPd/rGO                                        | -                                                                      | 22.76                                                 | 1.56                                          | 31        |
| Pt/AC-MWCNT                                       | 55.8                                                                   | 27.02                                                 | 0.92                                          | 32        |
| Pt/C-OT-4                                         | 78.66                                                                  | 17.48                                                 | 1.82                                          | 33        |
| PtRu/rGO-2                                        | 69.21                                                                  | 17.9                                                  | 1.90                                          | 34        |
| Pt <sub>2</sub> Ir/MWCNT                          | 85.30                                                                  | 9.72                                                  | 1.10                                          | 35        |
| PtO <sub>x</sub> /CoO <sub>y</sub> @OC-700        | 10.9                                                                   | 24.387                                                | -                                             | 36        |

<sup>(a)</sup>Calculation from CV curves in N<sub>2</sub>-saturated 0.5 M H<sub>2</sub>SO<sub>4</sub> aqueous solution.

<sup>(b)</sup>Calculation from CV curves in N<sub>2</sub>-saturated 0.5 M H<sub>2</sub>SO<sub>4</sub> + 1 M CH<sub>3</sub>OH aqueous solution.

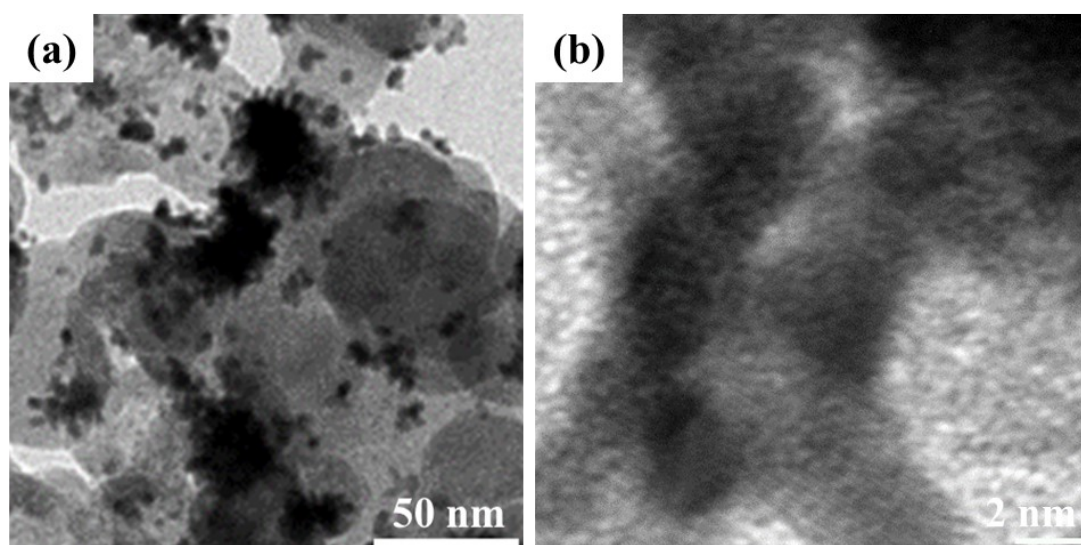**Figure S1.** (a) TEM and (b) HR-TEM images of the AgPt NCs/C catalyst after CA test.

**Table S4.** The MOR performance of electrocatalyst before and after 2000-cycling tests.

| Catalysts        | Methanol electro-oxidation     |             |                                               |             |               |
|------------------|--------------------------------|-------------|-----------------------------------------------|-------------|---------------|
|                  | Current density <sup>(a)</sup> |             |                                               |             | Deterioration |
|                  | mA cm <sup>-2</sup>            |             | I <sub>f</sub> /I <sub>b</sub> <sup>(a)</sup> |             |               |
|                  | Initial                        | 2000 cycles | Initial                                       | 2000 cycles | %             |
| AgPt NCs/C       | 22.65                          | 18.68       | 1.47                                          | 1.45        | 17.52         |
| Pt NPs/C (E-TEK) | 20.91                          | 14.90       | 0.85                                          | 0.79        | 28.74         |

<sup>(a)</sup>Calculation from CV curves in N<sub>2</sub>-saturated 0.5 M H<sub>2</sub>SO<sub>4</sub> + 1 M CH<sub>3</sub>OH solution before and after 2000 cycling test.

## References

1. Bhalothia, D.; Fan, Y.-J.; Lai, Y.-C.; Yang, Y.-T.; Yang, Y.-W.; Lee, C.-H.; Chen, T.-Y., *Nanomaterials* **2019**, *9* (7), 1003.
2. Huang, T.-H.; Bhalothia, D.; Dai, S.; Yan, C.; Wang, K.-W.; Chen, T.-Y., *Sustain. Energy Fuels* **2021**, *5* (11), 2960-2971.
3. Vargas-Ordaz, M.; Velázquez-Hernández, I.; Bañuelos, J. A.; Ledesma-García, J.; Álvarez-Contreras, L.; Arjona, N.; Guerra-Balcázar, M., *Mater. Today Energy* **2019**, *14*, 100335.
4. Zhang, C.; Zhang, Y.; Xiao, H.; Zhang, J.; Li, L.; Wang, L.; Bai, Q.; Liu, M.; Wang, Z.; Sui, N., *Colloids Surf. A Physicochem. Eng. Asp.* **2021**, *612*, 125960.
5. Huang, X.; Chen, Y.; Zhu, E.; Xu, Y.; Duan, X.; Huang, Y., *J. Mater. Chem. A* **2013**, *1* (46), 14449-14454.
6. Zhang, G.; Yang, Z.; Zhang, W.; Hu, H.; Wang, C.; Huang, C.; Wang, Y., *Nanoscale* **2016**, *8* (5), 3075-3084.
7. He, Y.; Chen, W.; Li, X.; Zhang, Z.; Fu, J.; Zhao, C.; Xie, E., *ACS Nano* **2013**, *7* (1), 174.
8. Li, N.; Tang, S.; Pan, Y.; Meng, X., *Mater. Res. Bull.* **2014**, *49*, 119-125.
9. Benck, J. D.; Chen, Z.; Kuritzky, L. Y.; Forman, A. J.; Jaramillo, T. F., *ACS Catal.* **2012**, *2* (9), 1916-1923.
10. Kibsgaard, J.; Jaramillo, T. F., Molybdenum Phosphosulfide: An Active, Acid-Stable, Earth-Abundant Catalyst for the Hydrogen Evolution Reaction. *Angew. Chem. Int. Ed.* **2014**, *53* (52), 14433-14437.
11. Chen, Y.; Ding, R.; Li, J.; Liu, J., *Appl. Catal. B: Environ.* **2022**, *301*, 120830.
12. Fei, H.; Dong, J.; Arellano-Jiménez, M. J.; Ye, G.; Dong Kim, N.; Samuel, E. L. G.; Peng, Z.; Zhu, Z.; Qin, F.; Bao, J.; Yacaman, M. J.; Ajayan, P. M.; Chen, D.; Tour, J. M., *Nat. Commun.* **2015**, *6* (1), 8668.
13. Huang, T.; Mao, S.; Zhou, G.; Zhang, Z.; Wen, Z.; Huang, X.; Ci, S.; Chen, J., *Nanoscale* **2015**, *7* (4), 1301-1307.
14. Lee, S.; Kim, H. J.; Choi, S. M.; Seo, M. H.; Kim, W. B., *Appl. Catal. A: Gen* **2012**, *429-430*, 39-47.
15. Zhang, X.; Wang, S.; Wu, C.; Li, H.; Cao, Y.; Li, S.; Xia, H., *J. Mater. Chem. A* **2020**, *8* (45), 23906-23918.
16. Yi, M.; Hu, S.; Lu, B.; Li, N.; Zhu, Z.; Huang, X.; Wang, M.; Zhang, J., *J. Alloys Compd.* **2021**, *884*, 161042.
17. Chen, S.-S.; Nan, L.-J.; Feng, J.-J.; Zhang, L.; Fang, K.-M.; Luo, X.; Wang, A.-J., *Int. J.*



*Hydrog. Energy* **2018**, *43* (12), 6096-6106.

18. Yan, X.; Li, H.; Sun, J.; Liu, P.; Zhang, H.; Xu, B.; Guo, J., *Carbon* **2018**, *137*, 405-410.
19. Chen, J.; Qin, M.; Ma, S.; Fan, R.; Zheng, X.; Mao, S.; Chen, C.; Wang, Y., *Appl. Catal. B: Environ.* **2021**, *299*, 120640.
20. Yi, M.; Li, N.; Lu, B.; Li, L.; Zhu, Z.; Zhang, J., *Energy Storage Mater.* **2021**, *42*, 418-429.
21. Shao, F.-Q.; Feng, J.-J.; Yang, Z.-Z.; Chen, S.-S.; Yuan, J.; Wang, A.-J., *Int. J. Hydrog. Energy* **2017**, *42* (39), 24767.
22. Wang, S.; Cao, Y.; Jia, W.; Lu, Z.; Jia, D., *Appl. Catal. B: Environ.* **2021**, *298*, 120579.
23. Hu, J.; Fang, C.; Jiang, X.; Zhang, D.; Cui, Z., *Inorg. Chem. Front.* **2020**, *7* (22), 4377.
24. Wei, M.; Huang, L.; Huang, S.; Chen, Z.; Lyu, D.; Zhang, X.; Wang, S.; Tian, Z. Q.; Shen, P. K., *J. Catal.* **2020**, *381*, 385-394.
25. Hou, D.; Zhou, W.; Liu, X.; Zhou, K.; Xie, J.; Li, G.; Chen, S., *Electrochim. Acta* **2015**, *166*, 26-31.
26. Zhang, Y.; Liu, L.; Sun, C.; Du, Y.; Zhou, Y.; Xie, Q., *J. Alloys Compd.* **2021**, *888*, 161564.
27. Liu, Q.; He, Y.-M.; Weng, X.; Wang, A.-J.; Yuan, P.-X.; Fang, K.-M.; Feng, J.-J., *J. Colloid Interface Sci.* **2018**, *513*, 455-463.
28. Li, L.; Wang, S.; Xiong, L.; Wang, B.; Yang, G.; Yang, S., *J. Mater. Chem. A* **2019**, *7* (20), 12800-12807.
29. Zhang, X.; Ma, J.; Yan, R.; Cheng, W.; Zheng, J.; Jin, B., *J. Alloys Compd.* **2021**, *867*, 159017.
30. Liao, W.; Zhou, S.; Wang, Z.; Liu, F.; Cao, J.; Wang, Q., *Fuel* **2022**, *308*, 122073.
31. Yang, C.; Zhang, D.; Zhao, W.; Cui, M.; Liang, R.; Ou, Q.; Zhang, S., *J. Alloys Compd.* **2020**, *835*, 155334.
32. Bhuvanendran, N.; Ravichandran, S.; Peng, K.; Xu, Q.; Khotseng, L.; Su, H., *Appl. Surf. Sci.* **2021**, *565*, 150511.
33. Chang, X.; Dong, F.; Yang, S.; Tang, Z.; Zha, F., *Int. J. Hydrog. Energy* **2019**, *44* (39), 21559-21568.
34. Shi, Y.; Zhu, W.; Shi, H.; Liao, F.; Fan, Z.; Shao, M., *J. Colloid Interface Sci.* **2019**, *557*, 729-736.
35. Bhuvanendran, N.; Ravichandran, S.; Zhang, W.; Ma, Q.; Xu, Q.; Khotseng, L.; Su, H., *Int. J. Hydrog. Energy* **2020**, *45* (11), 6447-6460.
36. Ding, C.; Dong, F.; Tang, Z., *J. Electroanal. Chem.* **2021**, *895*, 115487.
